# Supplementary material for: T Cell Response in Tuberculosis-Infected Patients Vaccinated against COVID-19
Source: MDPI journal article supplement (doi:10.3390/microorganisms11112810), 2023-11-19
Supplement: s1 [file s1]

Supplementary Data

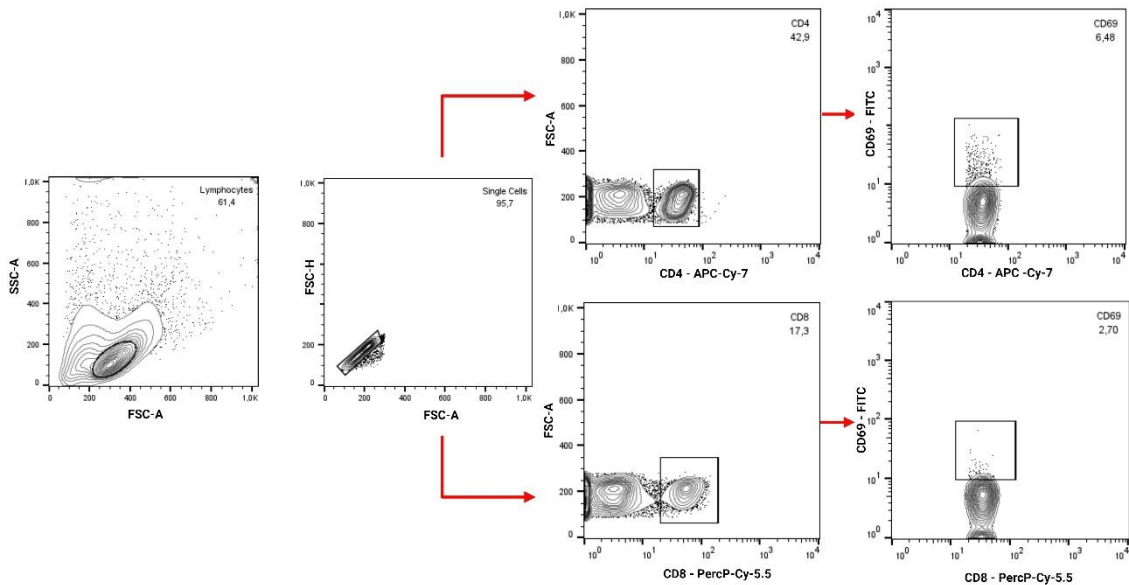

**Supplementary Figure S1.** Flow cytometry data analysis. The total lymphocyte gate was first selected through SSC and FSC-A profiles, followed by singlet separation using the FSC-A × FSC-H parameters. Next, the CD4<sup>+</sup> or CD8<sup>+</sup> T cells were set using FSC-A × CD8/CD4 parameters. Finally, the markers/CD4 (e.g., CD69/CD4) or CD8 (e.g., CD69/CD8) were set.

**Supplementary Table S1.** Gender, age, and ethnic-racial self-classification, comorbidities of donors.

|                                             | HC                                       | NTB patients | VTB patients  |
|---------------------------------------------|------------------------------------------|--------------|---------------|
| <b>Volunteers</b>                           | 9                                        | 3            | 8             |
| <b>Gender – F<sup>+</sup>/M<sup>+</sup></b> | 5F/4M                                    | 3M           | 4F/4M         |
| <b>Age (S.E.M.#)</b>                        | 35.63(±3.05)                             | 26 (±1)      | 34.69 (±3.01) |
|                                             | <b>Ethnic-racial self-classification</b> |              |               |
| <b>Brown</b>                                | 44.4%                                    | 66.67%       | 50%           |
| <b>Black</b>                                | x                                        | x            | 25%           |
| <b>White</b>                                | 44.4%                                    | 33.33%       | 25%           |
| <b>Indigenous</b>                           | 11.1%                                    | x            | x             |
|                                             | <b>Comorbidities</b>                     |              |               |
| <b>Diabetes (%)</b>                         | x                                        | x            | 50%           |
| <b>Insuficiência cardíaca (%)</b>           | x                                        | x            | 12.5%         |
| <b>Hypertension (%)</b>                     | x                                        | x            | 12.5%         |
| <b>Asthma (%)</b>                           | x                                        | x            | 25%           |
| <b>Others (%)</b>                           | x                                        | x            | 12.5%         |

F, Female; M, Male. HC = health control; NTB = non-vaccinated with active tuberculosis; VTB = vaccinated with active tuberculosis.

**Supplementary Table S2.** Means  $\pm$  standard error (SEM) of all parameters analyzed in CD4<sup>+</sup> T cells.

| <b>CD137</b>                   | <b>HC</b>        | <b>NTB</b>       | <b>VTB</b>      |
|--------------------------------|------------------|------------------|-----------------|
| Medium                         | 2.45 $\pm$ 4.56  | 8.73 $\pm$ 3.38  | 4.56 $\pm$ 0.75 |
| Pool Spike CoV-2               | 2.69 $\pm$ 5.41  | 8.26 $\pm$ 0.03  | 5.41 $\pm$ 1.74 |
| Pool CoV-2                     | 2.64 $\pm$ 6.85  | 8.52 $\pm$ 2.41  | 6.85 $\pm$ 1.89 |
| SEB                            | 4.42 $\pm$ 7.87  | 10.37 $\pm$ 2.55 | 7.87 $\pm$ 1.47 |
| <b>CD69</b>                    | <b>HC</b>        | <b>NTB</b>       | <b>VTB</b>      |
| Medium                         | 3.00 $\pm$ 0.20  | 2.69 $\pm$ 0.33  | 1.85 $\pm$ 0.41 |
| Pool Spike CoV-2               | 2.92 $\pm$ 0.55  | 2.25 $\pm$ 0.52  | 3.31 $\pm$ 0.63 |
| Pool CoV-2                     | 2.51 $\pm$ 0.29  | 7.06 $\pm$ 0.18  | 3.63 $\pm$ 0.83 |
| SEB                            | 24.83 $\pm$ 6.75 | 14.20 $\pm$ 2.71 | 8.80 $\pm$ 1.67 |
| <b>TNF-<math>\alpha</math></b> | <b>HC</b>        | <b>NTB</b>       | <b>VTB</b>      |
| Medium                         | 2.04 $\pm$ 0.26  | 5.73 $\pm$ 0.39  | 3.87 $\pm$ 0.56 |
| Pool Spike CoV-2               | 1.82 $\pm$ 0.33  | 4.33 $\pm$ 0.81  | 4.88 $\pm$ 0.75 |
| Pool CoV-2                     | 2.05 $\pm$ 0.36  | 4.98 $\pm$ 0.003 | 3.15 $\pm$ 0.44 |
| SEB                            | 1.93 $\pm$ 0.35  | 8.75 $\pm$ 0.95  | 4.46 $\pm$ 0.56 |
| <b>IFN-<math>\gamma</math></b> | <b>HC</b>        | <b>NTB</b>       | <b>VTB</b>      |
| Medium                         | 1.36 $\pm$ 0.31  | 2.41 $\pm$ 0.06  | 3.81 $\pm$ 0.62 |
| Pool Spike CoV-2               | 1.15 $\pm$ 0.14  | 3.71 $\pm$ 0.16  | 5.09 $\pm$ 1.32 |
| Pool CoV-2                     | 1.59 $\pm$ 0.27  | 3.79 $\pm$ 0.49  | 5.77 $\pm$ 1.45 |
| SEB                            | 1.73 $\pm$ 0.06  | 5.74 $\pm$ 1.19  | 6.82 $\pm$ 1.87 |
| <b>IL-17</b>                   | <b>HC</b>        | <b>NTB</b>       | <b>VTB</b>      |
| Medium                         | 1.63 $\pm$ 0.15  | 2.86 $\pm$ 0.28  | 2.27 $\pm$ 0.70 |
| Pool Spike CoV-2               | 2.02 $\pm$ 0.16  | 3.56 $\pm$ 0.09  | 3.44 $\pm$ 0.76 |
| Pool CoV-2                     | 2.02 $\pm$ 0.20  | 4.90 $\pm$ 0.51  | 3.17 $\pm$ 0.84 |
| SEB                            | 2.12 $\pm$ 0.17  | 8.19 $\pm$ 1.04  | 3.71 $\pm$ 0.45 |
| <b>IL-10</b>                   | <b>HC</b>        | <b>NTB</b>       | <b>VTB</b>      |
| Medium                         | 0.96 $\pm$ 0.07  | 4.07 $\pm$ 1.04  | 3.81 $\pm$ 0.78 |
| Pool Spike CoV-2               | 1.47 $\pm$ 0.12  | 3.12 $\pm$ 0.17  | 5.87 $\pm$ 0.83 |
| Pool CoV-2                     | 1.35 $\pm$ 0.11  | 4.40 $\pm$ 0.87  | 5.39 $\pm$ 1.13 |
| SEB                            | 2.43 $\pm$ 0.30  | 2.53 $\pm$ 0.42  | 3.85 $\pm$ 0.42 |

HC = health control (n = 9); NTB = non-vaccinated with active tuberculosis (n = 3); VTB = vaccinated with active tuberculosis (n = 8). PS = Pool Spike Cov-2; PT = Pool CoV-2; SEB = staphylococcal enterotoxin B.

**Supplementary Table S3.** Means  $\pm$  standard error (SEM) of all parameters analyzed in CD8<sup>+</sup> T cells.

| <b>CD137</b>                   | <b>HC</b>        | <b>NTB</b>       | <b>VTB</b>       |
|--------------------------------|------------------|------------------|------------------|
| Medium                         | 2.41 $\pm$ 0.35  | 2.52 $\pm$ 0.93  | 4.35 $\pm$ 0.93  |
| Pool Spike CoV-2               | 3.22 $\pm$ 0.31  | 6.42 $\pm$ 2.93  | 5.38 $\pm$ 1.46  |
| Pool CoV-2                     | 2.63 $\pm$ 0.28  | 4.02 $\pm$ 1.44  | 5.69 $\pm$ 1.44  |
| SEB                            | 4.06 $\pm$ 1.55  | 3.78 $\pm$ 0.009 | 5.32 $\pm$ 1.23  |
| <b>CD69</b>                    | <b>HC</b>        | <b>NTB</b>       | <b>VTB</b>       |
| Medium                         | 6.22 $\pm$ 1.38  | 9.90 $\pm$ 0.97  | 5.44 $\pm$ 0.92  |
| Pool Spike CoV-2               | 4.95 $\pm$ 0.74  | 18.53 $\pm$ 4.24 | 8.17 $\pm$ 1.35  |
| Pool CoV-2                     | 5.99 $\pm$ 0.96  | 14.13 $\pm$ 3.79 | 4.79 $\pm$ 0.67  |
| SEB                            | 16.83 $\pm$ 3.83 | 11.16 $\pm$ 1.17 | 10.86 $\pm$ 1.97 |
| <b>TNF-<math>\alpha</math></b> | <b>HC</b>        | <b>NTB</b>       | <b>VTB</b>       |
| Medium                         | 2.83 $\pm$ 0.46  | 7.66 $\pm$ 0.72  | 5.24 $\pm$ 0.97  |
| Pool Spike CoV-2               | 3.25 $\pm$ 0.44  | 11.94 $\pm$ 5.11 | 5.08 $\pm$ 0.64  |
| Pool CoV-2                     | 2.79 $\pm$ 0.52  | 15.03 $\pm$ 0.03 | 7.47 $\pm$ 1.70  |
| SEB                            | 3.56 $\pm$ 0.31  | 7.72 $\pm$ 0.41  | 7.79 $\pm$ 1.16  |
| <b>IFN-<math>\gamma</math></b> | <b>HC</b>        | <b>NTB</b>       | <b>VTB</b>       |
| Medium                         | 1.93 $\pm$ 0.17  | 3.78 $\pm$ 0.40  | 3.69 $\pm$ 0.26  |
| Pool Spike CoV-2               | 2.04 $\pm$ 0.25  | 3.04 $\pm$ 0.34  | 6.59 $\pm$ 1.33  |
| Pool CoV-2                     | 4.61 $\pm$ 1.08  | 3.00 $\pm$ 0.31  | 6.20 $\pm$ 1.46  |
| SEB                            | 4.06 $\pm$ 0.37  | 5.67 $\pm$ 1.08  | 6.46 $\pm$ 1.36  |
| <b>IL-17</b>                   | <b>HC</b>        | <b>NTB</b>       | <b>VTB</b>       |
| Medium                         | 1.98 $\pm$ 0.30  | 9.12 $\pm$ 2.98  | 5.16 $\pm$ 0.83  |
| Pool Spike CoV-2               | 1.87 $\pm$ 0.13  | 3.25 $\pm$ 0.35  | 6.48 $\pm$ 1.55  |
| Pool CoV-2                     | 1.41 $\pm$ 0.17  | 9.25 $\pm$ 1.41  | 7.28 $\pm$ 1.41  |
| SEB                            | 2.28 $\pm$ 0.22  | 13.7 $\pm$ 4.84  | 10.0 $\pm$ 1.86  |
| <b>IL-10</b>                   | <b>HC</b>        | <b>NTB</b>       | <b>VTB</b>       |
| Medium                         | 2.06 $\pm$ 0.18  | 2.87 $\pm$ 0.10  | 3.47 $\pm$ 0.86  |
| Pool Spike CoV-2               | 1.62 $\pm$ 0.12  | 2.54 $\pm$ 0.40  | 2.16 $\pm$ 0.35  |
| Pool CoV-2                     | 3.03 $\pm$ 0.60  | 1.85 $\pm$ 0.14  | 3.79 $\pm$ 0.47  |
| SEB                            | 1.53 $\pm$ 0.20  | 5.04 $\pm$ 1.21  | 4.88 $\pm$ 1.10  |

HC = health control (n = 9); NTB = non-vaccinated with active tuberculosis (n = 3); VTB = vaccinated with active tuberculosis (n = 8). PS = Pool Spike Cov-2; PT = Pool CoV-2; SEB = staphylococcal enterotoxin B.
